# Supplementary material for: Nitrogen-Doped Nanoporous Anodic Stainless Steel Foils towards Flexible Supercapacitors
Source: MDPI journal article supplement (doi:10.3390/ma15041615), 2022-02-21
Supplement: s1 [file s1]

Supplementary

# Nitrogen-Doped Nanoporous Anodic Stainless Steel Foils towards Flexible Supercapacitors

Wenlei Zhang <sup>1</sup>, Jianle Xu <sup>1,\*</sup>, Gang Li <sup>1,\*</sup> and Kaiying Wang <sup>1,2</sup>

<sup>1</sup> Institute of Energy Innovation, College of Materials Science and Engineering & College of Information and Computer, Taiyuan University of Technology, Taiyuan 030024, China; zhangwenlei@tyut.edu.cn (W.Z.); wangkaiying@tyut.edu.cn (K.W.)

<sup>2</sup> Department of Microsystems-IMS, University of South-Eastern Norway, 3184 Horten, Norway

\* Correspondence: xujianle@tyut.edu.cn (J.X.); ligang02@tyut.edu.cn (G.L.)

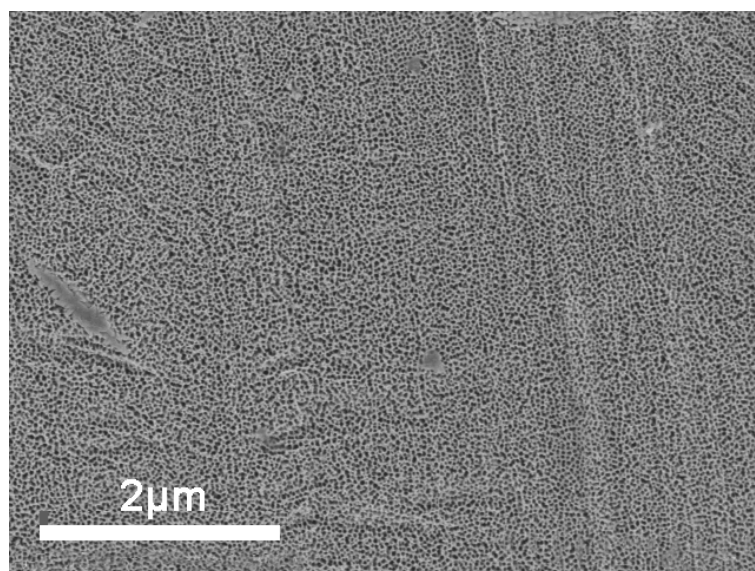

**Figure S1.** lower magnified SEM image of NASS sample.
